# Supplementary material for: Comparative metagenomic analysis of the oral microbiome in COVID-19 patients and healthy individuals
Source: Springer Nature journal article supplement (doi:10.1038/s41598-024-81864-3), 2025-03-25
Supplement: MOESM1 [file 41598_2024_81864_MOESM1_ESM.pdf]

| Patient ID | AGE | GENDER    | TOBACCO (YES/NO) | ALCOHOL (YES/NO) | Current Diseases (YES/NO) | DISEASE STATE            | COMORBIDITIES                                             | Medication (YES/NO) |
|------------|-----|-----------|------------------|------------------|---------------------------|--------------------------|-----------------------------------------------------------|---------------------|
| C1         |     | 36 Male   | YES              | YES              | Yes                       | Covid-Mild               | Vasculitic Neuropathy,Budd chiari Syndrome,Sensory Ataxia | YES                 |
| C10        |     | 30 Male   | NO               | NO               | Yes                       | Covid-Severe             | NIL                                                       | NO                  |
| C11        |     | 30 Female | NO               | NO               | Yes                       | Covid- Mild              | NIL                                                       | NI                  |
| C12        |     | 46 Female | NO               | NO               | Yes                       | Covid-Mild               | CHD,Viral Meningitis                                      | YES                 |
| C2         |     | 19 Female | NO               | NO               | Yes                       | Covid-Mild               | NIL                                                       | NO                  |
| C3         |     | 32 Female | NO               | NO               | Yes                       | Covid-Mild               | NIL                                                       | NO                  |
| C5         |     | 31 Female | NO               | NO               | Yes                       | Covid- Mild              | NIL                                                       | NO                  |
| C4         |     | 31 Female | NO               | NO               | Yes                       | Covid-Mild               | NIL                                                       | NO                  |
| C6         |     | 34 Female | NO               | NO               | Yes                       | Covid-Mild               | NIL                                                       | NO                  |
| C7         |     | 34 Female | NO               | NO               | Yes                       | Covid- Mild              | NIL                                                       | NO                  |
| C8         |     | 36 Male   | NO               | NO               | Yes                       | Covid- Mild              | Mutism,Since Birth,S/P LSCS-9 months Back                 | NO                  |
| C9         |     | 58 Female | NO               | NO               | Yes                       | Covid- Mild              | NIL                                                       | NO                  |
| C13        |     | 49 Male   | NO               | NO               | Yes                       | Covid-Mild/Diabetic      | NIL                                                       | NO                  |
| C14        |     | 63 Male   | NO               | NO               | Yes                       | Covid-Moderate/Diabetic  | NIL                                                       | NO                  |
| C15        |     | 63 Male   | NO               | NO               | Yes                       | Covid- Moderate/Diabetic | NIL                                                       | NO                  |
| C16        |     | 42 Female | NO               | NO               | Yes                       | Covid-Mild/Diabetic      | S/P MVR WITH LA                                           | YES                 |
| C17        |     | 69 Male   | NO               | NO               | Yes                       | Covid- Moderate/Diabetic | HTN,CAD                                                   | YES                 |
| C18        |     | 88 Female | NO               | NO               | Yes                       | Covid- Moderate/Diabetic | HTN                                                       | YES                 |
| C19        |     | 67 Female | NO               | NO               | Yes                       | Covid- Moderate/Diabetic | HTN                                                       | YES                 |
| C20        |     | 53 Male   | NO               | NO               | Yes                       | Covid-Mild/Diabetic      | NIL                                                       | YES                 |
| C21        |     | 48 Male   | NO               | NO               | Yes                       | Covid-Mild/Diabetic      | NIL                                                       | YES                 |
| C22        |     | 42 Male   | NO               | NO               | Yes                       | Covid- Mild/Diabetic     | NIL                                                       | NO                  |
| C23        |     | 36 Male   | NO               | NO               | Yes                       | Covid-Mild/Diabetic      | NIL                                                       | NO                  |
| C24        |     | 66 Male   | NO               | NO               | Yes                       | Covid-Mild/Diabetic      | NIL                                                       | NO                  |
| NC1        |     | 18 Male   | NO               | NO               | No                        | Healthy                  | NIL                                                       | NO                  |
| NC2        |     | 39 Male   | NO               | NO               | No                        | Healthy                  | NIL                                                       | NO                  |
| NC3        |     | 39 Male   | NO               | NO               | No                        | Healthy                  | NIL                                                       | NO                  |
| NC4        |     | 29 Male   | NO               | NO               | No                        | Healthy                  | NIL                                                       | NO                  |
| NC5        |     | 53 Female | NO               | NO               | No                        | Healthy                  | NIL                                                       | NO                  |
| NC6        |     | 26 Male   | YES              | YES              | No                        | Healthy                  | NIL                                                       | NO                  |
| NC7        |     | 23 Female | NO               | NO               | No                        | Healthy                  | NIL                                                       | NO                  |
| NC8        |     | 35 Female | NO               | NO               | No                        | Healthy                  | NIL                                                       | NO                  |
| NC9        |     | 25 Female | NO               | NO               | No                        | Healthy                  | NIL                                                       | NO                  |
| NC10       |     | 24 Male   | NO               | NO               | No                        | Healthy                  | NIL                                                       | NO                  |
| NC11       |     | 24 Male   | NO               | NO               | No                        | Healthy                  | NIL                                                       | NO                  |
| NC12       |     | 34 Male   | NO               | NO               | No                        | Healthy                  | NIL                                                       | NO                  |
| NC13       |     | 37 Male   | NO               | NO               | Yes                       | Diabetic                 | HTN                                                       | YES                 |
| NC14       |     | 56 Male   | NO               | NO               | Yes                       | Diabetic                 | CAD, BP, Thyroiddisease                                   | YES                 |
| NC15       |     | 48 Male   | NO               | NO               | Yes                       | Diabetic                 | HTN, CAD                                                  | YES                 |
| NC16       |     | 51 Female | NO               | NO               | Yes                       | Diabetic                 | Hypothyroidism, BP, Heart disease(CAD),Obese class1,      | YES                 |
| NC17       |     | 46 Male   | NO               | NO               | Yes                       | Diabetic                 | CAD                                                       | YES                 |
| NC18       |     | 39 Female | NO               | NO               | Yes                       | Diabetic                 | NIL                                                       | NO                  |
| NC19       |     | 68 Male   | NO               | NO               | Yes                       | Diabetic                 | CAD                                                       | YES                 |
| NC20       |     | 46 Male   | NO               | NO               | Yes                       | Diabetic                 | CABG done recently                                        | YES                 |
| NC21       |     | 54 Female | NO               | NO               | Yes                       | Diabetic                 | HTN                                                       | YES                 |
| NC22       |     | 47 Male   | NO               | NO               | Yes                       | Diabetic                 | Thyroid disease 4y                                        | YES                 |
| NC23       |     | 57 Male   | NO               | NO               | Yes                       | Diabetic                 | HTN                                                       | YES                 |
| NC24       |     | 69 Female | NO               | NO               | Yes                       | Diabetic                 | HTN, Thyroid disease, CAD                                 | YES                 |
